# Supplementary material
Source: MDPI journal article supplement (https://www.mdpi.com/2220-9964/11/11/551)
Supplement: s1 [file s1]

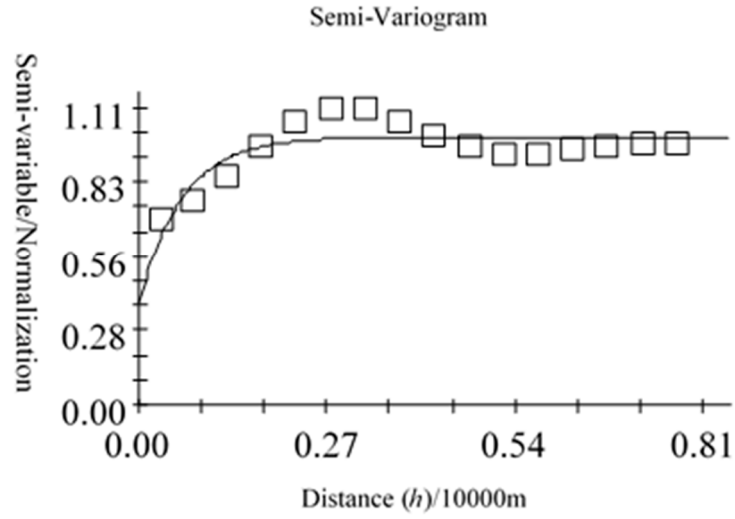

Figure S1. The Semi-variograms of *TGB*

Table S1. The final fitting results of SL-Tobit model

| Summary of Tobit-SL regression analysis results |                        |                |         |       |                 |
|-------------------------------------------------|------------------------|----------------|---------|-------|-----------------|
| item                                            | regression coefficient | standard error | $z$     | $p$   | 95% $CI$        |
| <i>TGB</i> (itself)                             | 0.738                  | 0.008          | 87.681  | 0.000 | 0.327~1.149     |
| $C$                                             | -0.087                 | 0.007          | -12.453 | 0.000 | -0.163 ~ -0.011 |
| $PI_1$                                          | 0.093                  | 0.008          | 11.976  | 0.000 | 0.078 ~ 0.108   |
| $PI_2$                                          | -0.038                 | 0.045          | -0.830  | 0.407 | -0.126 ~ 0.051  |
| $PI_3$                                          | -0.072                 | 0.037          | -1.940  | 0.052 | -0.145 ~ 0.001  |
| $PI_4$                                          | 0.077                  | 0.034          | 2.272   | 0.023 | 0.011 ~ 0.143   |
| $PI_5$                                          | 0.080                  | 0.011          | 7.533   | 0.000 | 0.060 ~ 0.101   |
| $PI_6$                                          | -0.088                 | 0.023          | -3.925  | 0.000 | -0.133 ~ -0.044 |
| $PI_7$                                          | 0.092                  | 0.037          | 2.473   | 0.013 | 0.019 ~ 0.164   |
| $PI_8$                                          | -0.068                 | 0.006          | -11.256 | 0.000 | -0.080 ~ -0.056 |
| $PI_9$                                          | -0.021                 | 0.040          | -0.531  | 0.595 | -0.099 ~ 0.057  |
| $PI_{10}$                                       | 0.699                  | 0.041          | 16.919  | 0.000 | 0.618 ~ 0.780   |
| $PI_{11}$                                       | 0.041                  | 0.023          | 1.752   | 0.080 | -0.005 ~ 0.087  |
| $PI_{12}$                                       | 0.407                  | 0.030          | 13.362  | 0.000 | 0.347 ~ 0.466   |
